# Supplementary material for: Effects of tocolysis with nifedipine or atosiban on child outcome: follow‐up of the APOSTEL III trial
Source: PubMed Central journal article supplement (PMC7384124; doi:10.1111/1471-0528.16186), 2020-03-29
Supplement: BJO-127-1129-s001.pdf [file BJO-127-1129-s001.pdf]

**Table S1.** Characteristics of children participating in follow-up study

|                            | <b>Nifedipine (n=115)</b> | <b>Atosiban (n=110)</b> | <b>P-value</b> |
|----------------------------|---------------------------|-------------------------|----------------|
| Age (months), median (IQR) | 51.1 (45.9 - 56.7)        | 53.4 (46.4 - 58.3)      | 0.14           |
| 30 - 36 months             | 3 (2.6%)                  | 2 (1.8%)                |                |
| 36 - 42 months             | 11 (9.6%)                 | 3 (2.7%)                |                |
| 42 - 48 months             | 22 (19%)                  | 28 (26%)                |                |
| 48 - 54 months             | 35 (30%)                  | 26 (24%)                |                |
| 54 - 60 months             | 0 (0.0%)                  | 0 (0.0%)                |                |
| 60 - 66 months             | 44 (38%)                  | 51 (46%)                |                |
| Sex (boys), N (%)          | 71 (62%)                  | 59 (54%)                | 0.22           |
| Twins*, N (%)              | 33 (29%)                  | 26 (24%)                | 0.30           |

\*: including 1 child born from a twin pregnancy in which the sibling did not survive.
