# Supplementary material for: Effects of tocolysis with nifedipine or atosiban on child outcome: follow‐up of the APOSTEL III trial
Source: PubMed Central journal article supplement (PMC7384124; doi:10.1111/1471-0528.16186), 2020-03-29
Supplement: BJO-127-1129-s002.pdf [file BJO-127-1129-s002.pdf]

**Table S2.** Baseline maternal characteristics of participants included in follow up vs not in follow up

|                                                | Included in follow up (n=196) | Not in follow up (n=307) | P-value |
|------------------------------------------------|-------------------------------|--------------------------|---------|
| Age (years), median (IQR)                      | 30.8 (28.2 - 33.9)            | 29.9 (25.6 - 33.3)       | 0.032   |
| BMI, median (IQR)*                             | 23.4 (21.2 - 25.8)            | 22.4 (20.4 - 25.4)       | 0.053   |
| Caucasian†                                     | 164 (89%)                     | 199 (76%)                | 0.0009  |
| Educational level‡                             |                               |                          | 0.028   |
| Primary school                                 | 3 (3.9%)                      | 3 (2.8%)                 |         |
| Secondary school                               | 0 (0.0%)                      | 6 (5.6%)                 |         |
| Lower professional education                   | 4 (5.3%)                      | 11 (10%)                 |         |
| Medium professional education                  | 24 (32%)                      | 48 (44%)                 |         |
| Higher professional education                  | 30 (40%)                      | 25 (23%)                 |         |
| University                                     | 15 (19.7%)                    | 15 (14%)                 |         |
| Nulliparous§                                   | 148 (76%)                     | 181 (59%)                | 0.0002  |
| History of preterm birth                       | 17 (8.7%)                     | 46 (15%)                 | 0.048   |
| Gestational age at randomisation, median (IQR) | 30.6 (28.4 - 32.3)            | 30.9 (28.9 - 33.0)       | 0.091   |
| Multiple gestation                             | 31 (16%)                      | 57 (18%)                 | 0.47    |
| PPROM                                          | 69 (35%)                      | 104 (34%)                | 0.77    |
| Cervical length¶                               | 14.0 (8.0-22.0)               | 14.0 (9.0-23.0)          | 0.81    |
| Dilatation¶¶                                   | 1.0 (1.0-2.0)                 | 1.0 (1.0-2.0)            | 0.35    |

Data are presented as n (%) or median (IQR). \*: in FU n=165 and not in FU n=240, †: in FU n=184 and not in FU n=261, ‡: in FU n=76 and not in FU n=108, §: in FU n=196 and not in FU n=306, ||: in FU n=196 and not in FU n=305, ¶: in FU n=119 and not in FU n=192, ¶¶: in FU n=97 and not in FU n=135.
