# Supplementary material for: Effects of tocolysis with nifedipine or atosiban on child outcome: follow‐up of the APOSTEL III trial
Source: PubMed Central journal article supplement (PMC7384124; doi:10.1111/1471-0528.16186), 2020-03-29
Supplement: BJO-127-1129-s003.pdf [file BJO-127-1129-s003.pdf]

**Table S3.** Short-term neonatal outcomes of participants included in follow up vs not in follow up

|                                                            | Included in follow up (n=225) | Not in follow up (n=366) | P-value |
|------------------------------------------------------------|-------------------------------|--------------------------|---------|
| Adverse perinatal composite outcome*                       | 28 (12%)                      | 59 (16%)                 | 0.26    |
| Bronchopulmonary dysplasia <sup>†</sup>                    | 11 (4.9%)                     | 21 (5.8%)                | 0.74    |
| Culture-proven sepsis <sup>†</sup>                         | 19 (8.4%)                     | 31 (8.5%)                | 0.84    |
| Intraventricular haemorrhage (grade ≥3) <sup>†</sup>       | 2 (0.9%)                      | 5 (1.4%)                 | 0.60    |
| Periventricular leukomalacia (grade >2) <sup>†</sup>       | 1 (0.4%)                      | 2 (0.5%)                 | 0.87    |
| Necrotising enterocolitis (stage >2) <sup>†</sup>          | 5 (2.2%)                      | 6 (1.6%)                 | 0.62    |
| NICU admission                                             | 137 (61%)                     | 201 (55%)                | 0.18    |
| Length of NICU admission (days) <sup>‡</sup>               | 15 (5.5-38)                   | 17 (7-40)                | 0.49    |
| Intubation <sup>§</sup>                                    | 35 (17%)                      | 62 (19%)                 | 0.49    |
| Time on intubation (days) <sup>  </sup>                    | 4.0 (1.0-7.5)                 | 3.0 (1.0-8.0)            | 0.64    |
| Any hospital admission                                     | 209 (93%)                     | 330 (90%)                | 0.26    |
| Days in hospital until 3 months corrected age <sup>¶</sup> | 32 (18-55)                    | 26 (10-47)               | 0.15    |
| Apnoea <sup>†</sup>                                        | 21 (9.3%)                     | 24 (6.6%)                | 0.31    |
| Asphyxia <sup>†</sup>                                      | 1 (0.4%)                      | 3 (0.8%)                 | 0.59    |
| Proven meningitis <sup>†</sup>                             | 2 (0.9%)                      | 5 (1.4%)                 | 0.60    |
| Birthweight (g) <sup>#</sup>                               | 1845 (1457-2540)              | 2000 (1525-2650)         | 0.21    |

Outcome data are n (%) or median (IQR).

\*: composed of perinatal in-hospital mortality and the following perinatal morbidities: bronchopulmonary dysplasia, culture-proven sepsis, intraventricular haemorrhage > grade 2, periventricular leukomalacia > grade 1, and necrotising enterocolitis > Bell's stage 1.

†: in FU n=225 and not in FU n=364, ‡: in FU n=135 and not in FU n=194, §: in FU n=203 and not in FU n=319, ||: in FU n=35 and not in FU n=61, ¶: in FU n=207 and not in FU n=324, #: only live births. in FU n=225 and not in FU n=343.
