# Supplementary material for: Effects of tocolysis with nifedipine or atosiban on child outcome: follow‐up of the APOSTEL III trial
Source: PubMed Central journal article supplement (PMC7384124; doi:10.1111/1471-0528.16186), 2020-03-29
Supplement: BJO-127-1129-s004.pdf [file BJO-127-1129-s004.pdf]

**Table S4.** Subgroup analyses

| <b>Outcome</b>                                         | <b>Subgroups</b>                  | <b>Nifedipine (n=115)</b> | <b>Atosiban (n=110)</b> | <b>p-value interaction term</b> |
|--------------------------------------------------------|-----------------------------------|---------------------------|-------------------------|---------------------------------|
| <b>PPROM vs no PPRM</b>                                |                                   |                           |                         |                                 |
| <b>Composite outcome:</b>                              | PPROM (n=80)                      | 8/40 (20%)                | 13/33 (39%)             | 0.15                            |
| <b>ASQ and/or BRIEF-P and/or CBCL abnormal ASQ-3:</b>  | No PPRM (n=145)                   | 24/67 (36%)               | 25/67 (37%)             |                                 |
| <b>Total developmental delay</b>                       | PPROM (n=80)                      | 8/42 (19%)                | 11/36 (31%)             | 0.21                            |
| <b>BRIEF-P:</b>                                        | No PPRM (n=145)                   | 20/69 (29%)               | 19/71 (27%)             |                                 |
| <b>Total executive function disorders</b>              | PPROM (n=80)                      | 2/40 (5.0%)               | 3/32 (9.4%)             | 0.50                            |
| <b>CBCL:</b>                                           | No PPRM (n=145)                   | 7/68 (10%)                | 7/70 (10%)              |                                 |
| <b>Total behavioural problems</b>                      | PPROM (n=80)                      | 2/43 (4.7%)               | 1/35 (2.9%)             | 0.89                            |
|                                                        | No PPRM (n=145)                   | 8/68 (12%)                | 6/69 (8.7%)             |                                 |
| <b>Singleton vs multiple pregnancy</b>                 |                                   |                           |                         |                                 |
| <b>Composite outcome:</b>                              | Singleton pregnancy (n=166)       | 26/77 (34%)               | 32/77 (42%)             | 0.96                            |
| <b>ASQ and/or BRIEF-P and/or CBCL abnormal ASQ-3:</b>  | Multiple pregnancy (n=59)         | 6/30 (20%)                | 6/23 (26%)              |                                 |
| <b>Total developmental delay</b>                       | Singleton pregnancy (n=166)       | 24/78 (31%)               | 26/83 (31%)             | 0.70                            |
| <b>BRIEF-P:</b>                                        | Multiple pregnancy (n=59)         | 4/33 (12%)                | 4/24 (17%)              |                                 |
| <b>Total executive function disorders</b>              | Singleton pregnancy (n=166)       | 8/78 (10%)                | 6/76 (7.9%)             | 0.12                            |
| <b>CBCL:</b>                                           | Multiple pregnancy (n=59)         | 1/30 (3.3%)               | 4/26 (15%)              |                                 |
| <b>Total behavioural problems</b>                      | Singleton pregnancy (n=166)       | 7/80 (8.8%)               | 6/79 (7.6%)             | 0.57                            |
|                                                        | Multiple pregnancy (n=59)         | 3/31 (9.7%)               | 1/25 (4.0%)             |                                 |
| <b>Gestational age at delivery &lt;32 vs ≥32 weeks</b> |                                   |                           |                         |                                 |
| <b>Composite outcome:</b>                              | GA at delivery < 32 weeks (n=103) | 16/46 (35%)               | 18/48 (38%)             | 0.56                            |
| <b>ASQ and/or BRIEF-P and/or CBCL abnormal ASQ-3:</b>  | GA at delivery ≥ 32 weeks (n=122) | 16/61 (26%)               | 20/52 (39%)             |                                 |
| <b>Total developmental delay</b>                       | GA at delivery < 32 weeks (n=103) | 15/47 (32%)               | 13/53 (25%)             | 0.18                            |
| <b>BRIEF-P:</b>                                        | GA at delivery ≥ 32 weeks (n=122) | 13/64 (20%)               | 17/54 (32%)             |                                 |
| <b>Total executive function disorders</b>              | GA at delivery < 32 weeks (n=103) | 3/44 (6.8%)               | 5/50 (10%)              | 0.68                            |
| <b>CBCL:</b>                                           | GA at delivery ≥ 32 weeks (n=122) | 6/64 (9.4%)               | 5/52 (9.6%)             |                                 |
| <b>Total behavioural problems</b>                      | GA at delivery < 32 weeks (n=103) | 5/48 (10%)                | 2/52 (3.8%)             | 0.36                            |
|                                                        | GA at delivery ≥ 32 weeks (n=122) | 5/63 (7.9%)               | 5/52 (9.6%)             |                                 |
| <b>Gestational age at delivery &lt;35 vs ≥35 weeks</b> |                                   |                           |                         |                                 |
| <b>Composite outcome:</b>                              | GA at delivery < 35 weeks (n=166) | 27/77 (35%)               | 29/74 (39%)             | 0.27                            |
| <b>ASQ and/or BRIEF-P and/or CBCL abnormal ASQ-3:</b>  | GA at delivery ≥ 35 weeks (n=59)  | 5/30 (17%)                | 9/26 (35%)              |                                 |
| <b>Total developmental delay</b>                       | GA at delivery < 35 weeks (n=166) | 24/81 (30%)               | 24/80 (30%)             | 0.44                            |
| <b>BRIEF-P:</b>                                        | GA at delivery ≥ 35 weeks (n=59)  | 4/30 (13%)                | 6/27 (22%)              |                                 |
| <b>Total executive function disorders</b>              | GA at delivery < 35 weeks (n=166) | 7/77 (9.1%)               | 8/76 (11%)              | 0.99                            |
| <b>CBCL:</b>                                           | GA at delivery ≥ 35 weeks (n=59)  | 2/31 (6.5%)               | 2/26 (7.7%)             |                                 |
| <b>Total behavioural problems</b>                      | GA at delivery < 35 weeks (n=166) | 9/81 (11%)                | 5/79 (6.3%)             | 0.28                            |
|                                                        | GA at delivery ≥ 35 weeks (n=59)  | 1/30 (3.3%)               | 2/25 (8.0%)             |                                 |

The interaction term (p-value) indicates whether there is an interaction between treatment allocation and outcome for subgroups, i.e. whether the effect of treatment allocation on outcome is meaningfully different for the different subgroups.
